# Supplementary material
Source: publisher site journal article supplement (https://www.dovepress.com/article/259134)
Supplement: Supplementary file 1 [file get_supplementary_file.php]

**Table S1:** Histopathological scoring of hippocampal tissue in mice of different treated groups.

| Lesions | Cont | SeNPs | PTZ | SeNPs+PTZ | VPA+PTZ |
| --- | --- | --- | --- | --- | --- |
| Degenerated neurons | 1.3±0.52 | 1.17±0.41 | 2.3±0.52# | 1.7±0.52$ | 1.8±0.41$ |
| Vacuolations | 1.0±0.1 | 1.0±0.1 | 2.7±0.82# | 1.8±0.41#$ | 2.2±0.41#$ |
| Inflammatory cells | 1.3±0.52 | 1.2±0.41 | 2.8±0.41# | 2.0±0.14#$ | 2.2±0.42#$ |
| Apoptotic cells | 1.3±0.48 | 1.2±0.41 | 2.5±0.55# | 1.7±0.51#$ | 1.8±0.44#$ |

The severity of lesions specified as follows: 1 = minimal (<1%); 2 = slight (1%–25%); 3 = moderate (26%–50%); 4 = moderate/severe (51%–75%); and 5 = severe (76%–100%). Data expressed as mean± SD of 6 fields. Significant change was recorded following analysis with Duncan’s test as a post hoc test (*P* < 0.05). # represent a significant change against the controlmice; $ represent a significant change against the PTZ-injected mice.
